# Supplementary material
Source: publisher site journal article supplement (https://www.spandidos-publications.com/8111/downloadSupplementary)

Figure S1. Clinical correlation analysis of HMBOX1 and PTPN1. (A and B) The GEPIA2 database was used to analyze the expression of HMBOX1 (A) or PTPN1 (B) in tumor tissues of patients with HCC at different stages. (C and D) The GEPIA2 database was used to analyze the correlation between the expressions of HMBOX1 (C) or PTPN1 (D) and the expression of AFP in the tumor tissues of patients with HCC. (E-H) The cBioPortal database was used to analyze the effects of adjuvant postoperative pharmaceutical therapy (E and F) and ablation embolization tx adjuvant (G and H) on the expression of HMBOX1 and PTPN1 in tumor tissues. HMBOX1, homeobox containing 1; PTPN1, protein tyrosine phosphatase non-receptor type 1; HCC, hepatocellular carcinoma; ns, not significant.

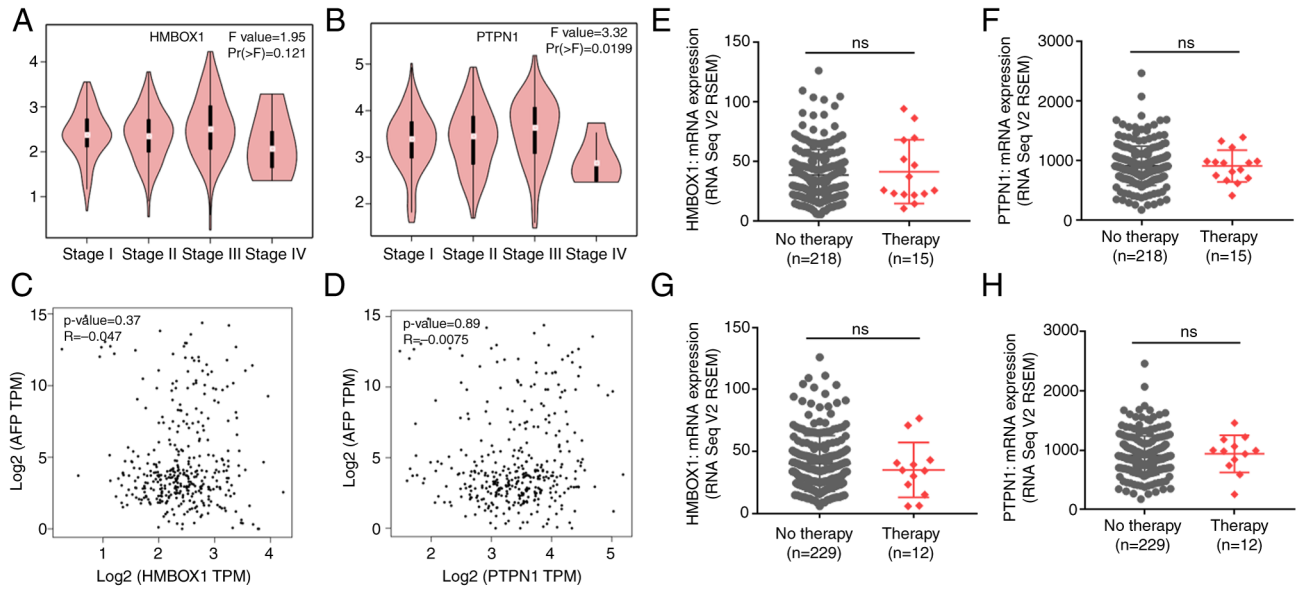

Figure S2. Detection of the effect of intervention on HMBOX1/PTPN1 expression. (A and B) The effect of overexpression of HMBOX1 through lentiviral transfection in HCC was detected by western blotting. (C) The effect of silencing HMBOX1 by siRNA in Huh-7 cells was detected using western blotting. (D and E) The effect of silencing PTPN1 by siRNAs in HCC cells was detected using western blotting. HMBOX1, homeobox containing 1; PTPN1, protein tyrosine phosphatase non-receptor type 1; HCC, hepatocellular carcinoma; siRNA, small interfering RNA; siNC, small interfering negative control.

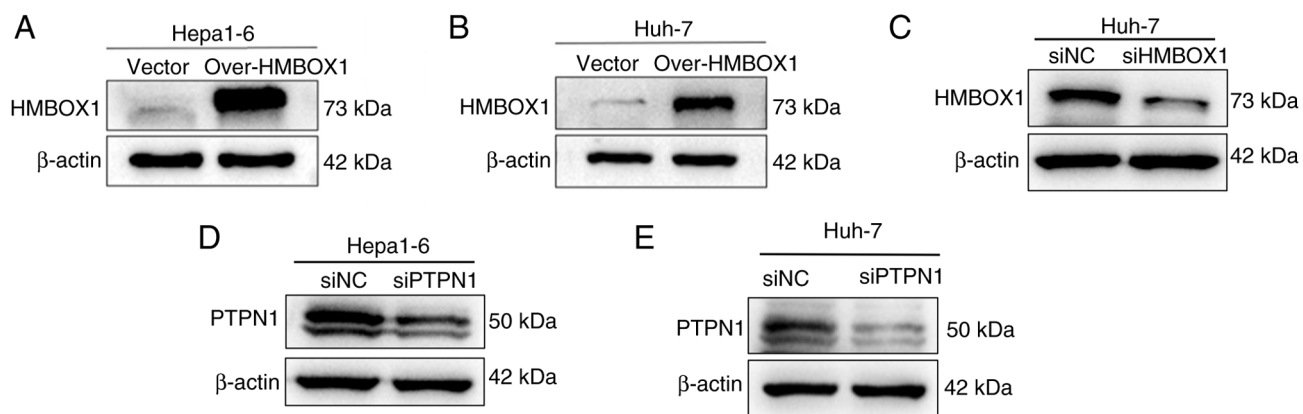

Figure S3. Proteomics differential gene enrichment analysis. (A and B) The Metascape database was used to conduct GO and KEGG pathway enrichment analyses on the differentially expressed genes with up-regulated (A) or downregulated (B) expression screened by proteomics. GO, Gene ontology; KEGG, Kyoto Encyclopedia of Genes and Genomes.

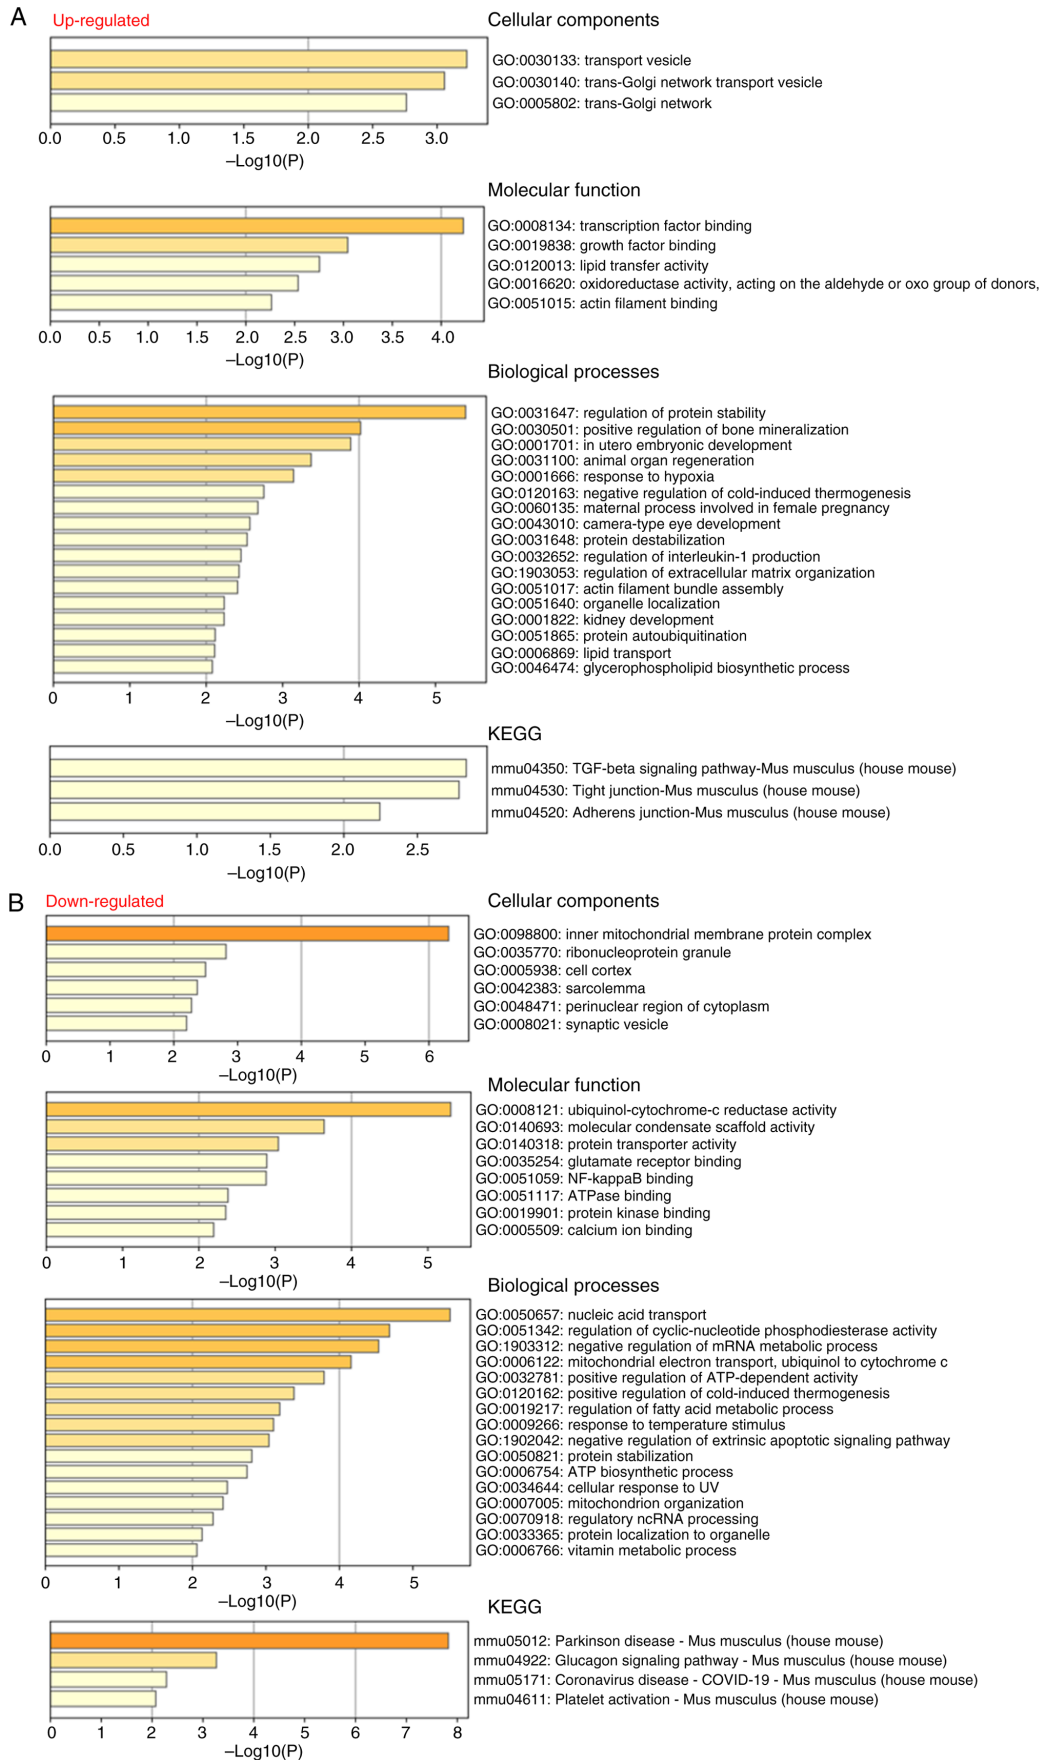

Figure S4. HMBOX1 regulates PTPN1 expression indirectly. (A and B) HMBOX1 binding motif (A) and two potential HMBOX1-binding sites within the 2-kb region upstream of the transcription start site of PTPN1 analyzed by JASPAR database (B). (C) Agarose electrophoresis for chromatin immunoprecipitation analysis of HMBOX1 binding to the PTPN1 promoter-specific sequences predicted by JASPAR database. The protein molecules bound to HMBOX1 in Hepa1-6 cells which overexpressing HMBOX1 were pulled down using co-immunoprecipitation, and then the protein molecules were analyzed by mass spectrometry. (D) The Metascape database was used to conduct GO enrichment analysis on PTPN1 and the proteins bound to HMBOX1. (E) The GO terms that contain PTPN1 were selected in the enrichment analysis results and the Upset graph was drawn. (F) The protein-protein interaction between SOD2 and PTPN1 was analyzed using the STRING database. HMBOX1, homeobox containing 1; PTPN1, protein tyrosine phosphatase non-receptor type 1; GO, Gene ontology.

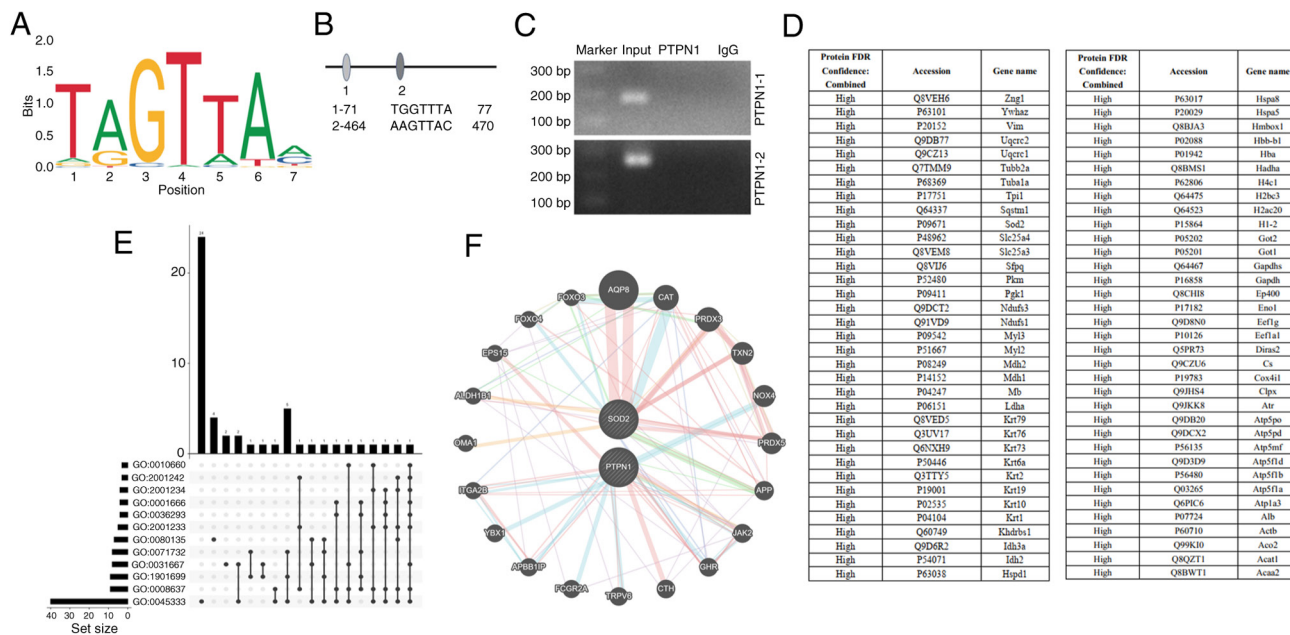

Supplement: Supplementary file 1 [file downloadSupplementary]
